# Supplementary material for: Observation of dihydrated glycine
Source: Royal Society of Chemistry journal article supplement (doi:10.1039/c3cc40344k), 2013-01-01
Supplement: c3cc40344k.pdf [file c3cc40344k.pdf]

## Supporting Information

### Observation of Dihydrated Glycine

**Table S1.** Cartesian coordinates for the observed conformer of dihydrated glycine from MP2/6-311++G(d,p) calculations.

Standard orientation:

| Center Number | Atomic Number | Atomic Type | Coordinates (Angstroms) |           |           |
|---------------|---------------|-------------|-------------------------|-----------|-----------|
|               |               |             | X                       | Y         | Z         |
| 1             | 7             | 0           | 3.025614                | 0.738135  | 0.031747  |
| 2             | 6             | 0           | 2.235664                | -0.477418 | -0.003856 |
| 3             | 6             | 0           | 0.725273                | -0.290621 | -0.017653 |
| 4             | 8             | 0           | 0.187216                | 0.807104  | -0.062498 |
| 5             | 8             | 0           | 0.086351                | -1.453181 | 0.014749  |
| 6             | 1             | 0           | -0.896300               | -1.310644 | -0.013413 |
| 7             | 1             | 0           | 2.775829                | 1.329994  | -0.754118 |
| 8             | 1             | 0           | 2.797494                | 1.270697  | 0.865123  |
| 9             | 1             | 0           | 2.495961                | -1.062198 | -0.892160 |
| 10            | 8             | 0           | -2.504106               | 1.568481  | 0.108392  |
| 11            | 1             | 0           | -1.536176               | 1.497924  | 0.049231  |
| 12            | 1             | 0           | -2.741203               | 2.274758  | -0.496261 |
| 13            | 8             | 0           | -2.568162               | -1.135868 | -0.087802 |
| 14            | 1             | 0           | -2.783369               | -0.184334 | -0.038482 |
| 15            | 1             | 0           | -3.149381               | -1.560589 | 0.547274  |
| 16            | 1             | 0           | 2.481845                | -1.106606 | 0.856906  |

Rotational constants (GHZ):            3.6930617            1.0952084            0.8555568

Dipole moment (field-independent basis, Debye):  
X= -1.6521    Y= 0.6804    Z= 0.0926    Tot= 1.7891

### Complete reference 15.

Frisch, M. J.; Trucks, G. W.; Schlegel, H. B.; Scuseria, G. E.; Robb, M. A.; Cheeseman, J. R.; Montgomery, J. A., Jr.; Vreven, T.; Kudin, K. N.; Burant, J. C.; Millam, J. M.; Iyengar, S. S.; Tomasi, J.; Barone, V.; Mennucci, B.; Cossi, M.; Scalmani, G.; Rega, N.; Petersson, G. A.; Nakatsuji, H.; Hada, M.; Ehara, M.; Toyota, K.; Fukuda, R.; Hasegawa, J.; Ishida, M.; Nakajima, T.; Honda, Y.; Kitao, O.; Nakai, H.; Klene, M.; Li, X.; Knox, J. E.; Hratchian, H. P.; Cross, J. B.; Adamo, C.; Jaramillo, J.; Gomperts, R.; Stratmann, R. E.; Yazyev, O.; Austin, A. J.; Cammi, R.; Pomelli, C.; Ochterski, J. W.; Ayala, P. Y.; Morokuma, K.; Voth, G. A.; Salvador, P.; Dannenberg, J. J.; Zakrzewski, V. G.; Dapprich, S.; Daniels, A. D.; Strain, M. C.; Farkas, O.; Malick, D. K.; Rabuck, A. D.; Raghavachari, K.; Foresman, J. B.; Ortiz, J. V.; Cui, Q.; Baboul, A. G.; Clifford, S.; Cioslowski, J.; Stefanov, B. B.; Liu, G.; Liashenko, A.; Piskorz, P.; Komaromi, I.; Martin, R. L.; Fox, D. J.; Keith, T.; AlLaham, M. A.; Peng, C. Y.; Nanayakkara, A.; Challacombe, M.; Gill, P. M. W.; Johnson, B.; Chen, W.; Wong, M. W.; González, C.; Pople, J. A. Gaussian 03, Revision B.04; Gaussian, Inc.: Pittsburgh, PA, 2003.
